# Supplementary material
Source: PubMed Central journal article supplement (PMC5605429)
Supplement: NIHMS884313-supplement-supplement_1.pdf [file NIHMS884313-supplement-supplement_1.pdf]

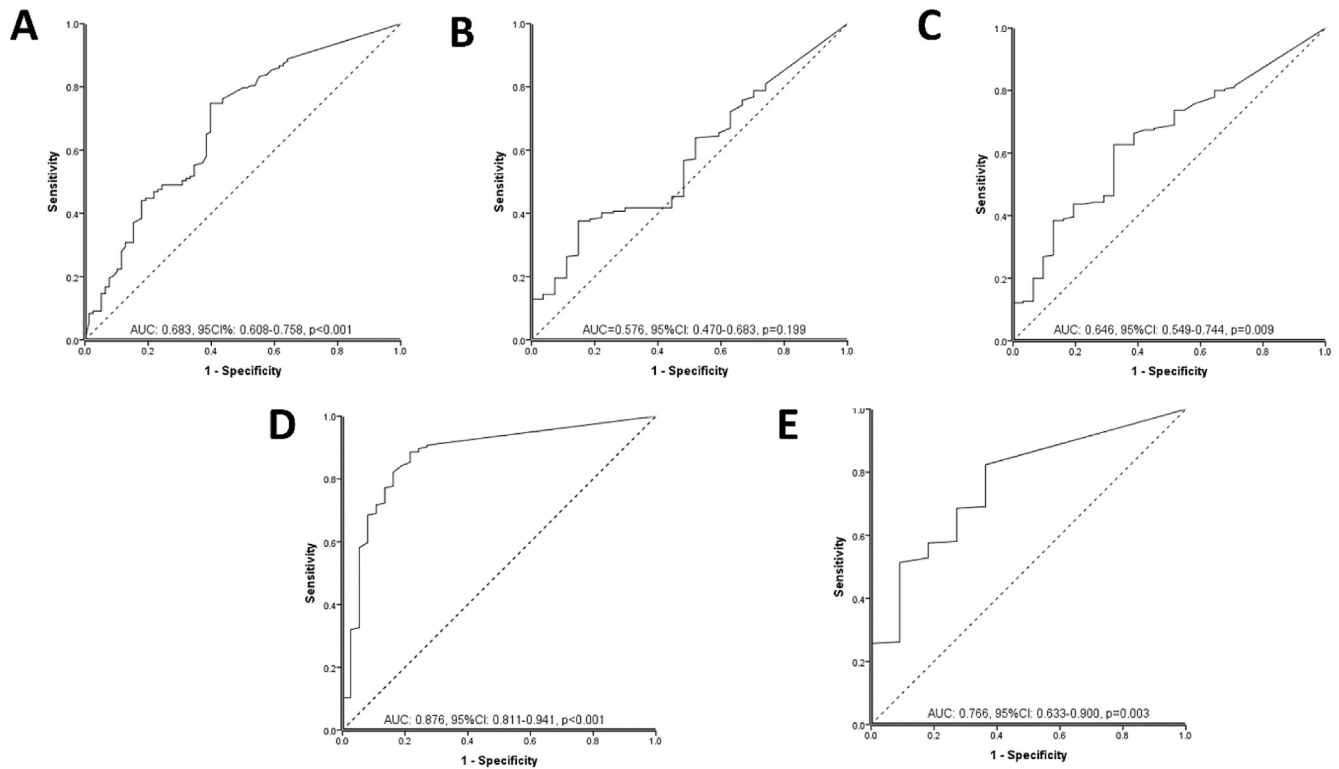

**Supplementary Figure 1.** Receiver-operating characteristic curve analysis for infliximab trough concentrations at start of therapeutic drug monitoring stratifying patients with or without treatment failure (A), inflammatory bowel disease-related surgery (B), inflammatory bowel disease-related hospitalization (C), antibodies to infliximab (D), and serious infusion reaction (E). AUC, area under the curve; CI, confidence interval.

**Supplementary Table 1.** Variables Associated With Time to IBD-Related Surgery

| Variables                                         | Univariate analysis |      |           | Multivariate analysis |      |           |
|---------------------------------------------------|---------------------|------|-----------|-----------------------|------|-----------|
|                                                   | P value             | HR   | 95% CI    | P value               | HR   | 95% CI    |
| Gender                                            | .689                |      |           |                       |      |           |
| IBD type (UC vs CD)                               | .123                |      |           |                       |      |           |
| CD location                                       | .399                |      |           |                       |      |           |
| CD behavior                                       | .126                |      |           |                       |      |           |
| Age at diagnosis                                  | .488                |      |           |                       |      |           |
| Age at start of IFX                               | .766                |      |           |                       |      |           |
| Duration from IFX initiation until start of TDM   | .746                |      |           |                       |      |           |
| UC extension                                      | .146                |      |           |                       |      |           |
| Perianal fistulizing CD                           | .003                | 4.3  | 1.6–11.2  | .010                  | 3.6  | 1.4–9.5   |
| Ileocolonic resection prior to TDM                | .476                |      |           |                       |      |           |
| Concomitant IMM at start of TDM                   | .200                |      |           |                       |      |           |
| Anti-TNF naive                                    | .516                |      |           |                       |      |           |
| Smoking ever                                      | .376                |      |           |                       |      |           |
| IFX dosing other than 5 mg/kg q8w at start of TDM | .004                | 2.9  | 1.4–6     |                       |      |           |
| IFX concentration at start of TDM                 | .055                |      |           |                       |      |           |
| ATI at start of TDM                               | .878                |      |           |                       |      |           |
| Proactive TDM                                     | <.001               | 0.18 | 0.08–0.40 | .017                  | 0.30 | 0.11–0.80 |

ATI, antibodies to infliximab; CD, Crohn's disease; CI, confidence interval; HR, hazard ratio; IBD, inflammatory bowel disease; IFX, infliximab; IMM, immunomodulators; TDM, therapeutic drug monitoring; TNF, tumor necrosis factor; UC, ulcerative colitis.

**Supplementary Table 2.** Variables Associated With Time to IBD-Related Hospitalization

| Variables                                        | Univariate analysis |      |           | Multivariate analysis |      |           |
|--------------------------------------------------|---------------------|------|-----------|-----------------------|------|-----------|
|                                                  | P value             | HR   | 95% CI    | P value               | HR   | 95% CI    |
| Gender                                           | .376                |      |           |                       |      |           |
| IBD type (UC vs CD)                              | .063                |      |           |                       |      |           |
| CD location                                      | .129                |      |           |                       |      |           |
| CD behavior                                      | .241                |      |           |                       |      |           |
| Age at diagnosis                                 | .705                |      |           |                       |      |           |
| Age at start of IFX                              | .896                |      |           |                       |      |           |
| Duration from IFX initiation until start of TDM  | .271                |      |           |                       |      |           |
| UC extension                                     | .098                |      |           |                       |      |           |
| Perianal fistulizing CD                          | .105                |      |           |                       |      |           |
| Ileocolonic resection prior to TDM               | .502                |      |           |                       |      |           |
| Concomitant IMM at start of TDM                  | .327                |      |           |                       |      |           |
| Anti-TNF naïve                                   | .890                |      |           |                       |      |           |
| Smoking ever                                     | .771                |      |           |                       |      |           |
| IFX dosing other than 5mg/Kg q8w at start of TDM | .065                |      |           |                       |      |           |
| IFX concentration at start of TDM                | .018                | 0.94 | 0.90–0.99 |                       |      |           |
| ATI at start of TDM                              | .043                | 2.2  | 1.1–4.8   |                       |      |           |
| Proactive TDM                                    | <.001               | 0.14 | 0.07–0.3  | <.001                 | 0.16 | 0.07–0.33 |

ATI, antibodies to infliximab; CD, Crohn's disease; CI, confidence interval; HR, hazard ratio; IBD, inflammatory bowel disease; IFX, infliximab; IMM, immunomodulators; TDM, therapeutic drug monitoring; TNF, tumor necrosis factor; UC, ulcerative colitis.

**Supplementary Table 3.** Variables Associated With Time to Detectable Antibodies to Infliximab

| Variables                                        | Univariate analysis |       |             | Multivariate analysis |     |           |
|--------------------------------------------------|---------------------|-------|-------------|-----------------------|-----|-----------|
|                                                  | P value             | HR    | 95% CI      | P value               | HR  | 95% CI    |
| Gender                                           | .630                |       |             |                       |     |           |
| IBD type (UC vs CD)                              | .293                |       |             |                       |     |           |
| CD location                                      | .650                |       |             |                       |     |           |
| CD behavior                                      | .270                |       |             |                       |     |           |
| Age at diagnosis                                 | .825                |       |             |                       |     |           |
| Age at start of IFX                              | .029                | 1.021 | 1.002–1.041 |                       |     |           |
| Duration from IFX initiation until start of TDM  | .530                |       |             |                       |     |           |
| UC extension                                     | .551                |       |             |                       |     |           |
| Perianal fistulizing CD                          | .608                |       |             |                       |     |           |
| Ileocolonic resection prior to TDM               | .034                | 2.3   | 1.1–4.9     |                       |     |           |
| Concomitant IMM at start of TDM                  | .109                |       |             |                       |     |           |
| Anti-TNF naïve                                   | .343                |       |             |                       |     |           |
| Smoking ever                                     | .927                |       |             |                       |     |           |
| IFX dosing other than 5 mg/g q8w at start of TDM | .459                |       |             |                       |     |           |
| IFX concentration at start of TDM                | <.001               | 0.7   | 0.6–0.8     | <.001                 | .7  | 0.5–0.8   |
| Proactive TDM                                    | <.001               | 0.2   | 0.1–0.4     | .025                  | .25 | 0.07–0.84 |

ATI, antibodies to infliximab; CD, Crohn's disease; CI, confidence interval; HR, hazard ratio; IBD, inflammatory bowel disease; IFX, infliximab; IMM, immunomodulators; TDM, therapeutic drug monitoring; TNF, tumor necrosis factor; UC, ulcerative colitis.

**Supplementary Table 4.** Variables associated with time to serious infusion reaction

| Variables                                         | Univariate analysis |      |           | Multivariate analysis |      |           |
|---------------------------------------------------|---------------------|------|-----------|-----------------------|------|-----------|
|                                                   | P value             | HR   | 95% CI    | P value               | HR   | 95% CI    |
| Gender                                            | .994                |      |           |                       |      |           |
| IBD type (UC vs CD)                               | .827                |      |           |                       |      |           |
| CD location                                       | .544                |      |           |                       |      |           |
| CD behavior                                       | .382                |      |           |                       |      |           |
| Age at diagnosis                                  | .917                |      |           |                       |      |           |
| Age at start of IFX                               | .685                |      |           |                       |      |           |
| Duration from IFX initiation until start of TDM   | .260                |      |           |                       |      |           |
| UC extension                                      | .928                |      |           |                       |      |           |
| Perianal fistulizing CD                           | .844                |      |           |                       |      |           |
| Ileocolonic resection prior to TDM                | .747                |      |           |                       |      |           |
| Concomitant IMM at start of TDM                   | .540                |      |           |                       |      |           |
| Anti-TNF naive                                    | .654                |      |           |                       |      |           |
| Smoking ever                                      | .718                |      |           |                       |      |           |
| IFX dosing other than 5 mg/kg q8w at start of TDM | .325                |      |           |                       |      |           |
| IFX concentration at start of TDM                 | .003                | 0.74 | 0.61–0.90 | .011                  | 0.78 | 0.65–0.94 |
| ATI at start of TDM                               | <.001               | 8.1  | 2.8–23.3  |                       |      |           |
| Proactive TDM                                     | <.001               | 0.10 | 0.02–0.46 | .023                  | 0.17 | 0.04–0.78 |

ATI, antibodies to infliximab; CD, Crohn's disease; CI, confidence interval; HR, hazard ratio; IBD, inflammatory bowel disease; IFX, infliximab; IMM, immunomodulators; TDM, therapeutic drug monitoring; TNF, tumor necrosis factor; UC, ulcerative colitis.

**Supplementary Table 5.** Testing Results Stratified by the Type of Therapeutic Drug Monitoring Based on the First IFX Concentration and ATI

| Variable                       | Proactive TDM (n = 130) | Reactive TDM (n = 134) | P value |
|--------------------------------|-------------------------|------------------------|---------|
| IFX concentration undetectable | 12 (9)                  | 43 (32)                | <.001   |
| ATI                            | 7 (5)                   | 37 (28)                | <.001   |
| IFX TC undetectable            | 12 (9)                  | 30/91 (33)             | <.001   |
| IFX TC, $\mu\text{g/mL}$       | 9.1 (3.6–13.9)          | 3 (0–8.6)              | <.001   |
| IFX TC                         |                         |                        | <.001   |
| <3 $\mu\text{g/mL}$            | 28 (21.5)               | 45/91 (47)             |         |
| 3–7 $\mu\text{g/mL}$           | 28 (21.5)               | 19/91 (23)             |         |
| >7 $\mu\text{g/mL}$            | 74 (57)                 | 27/91 (30)             |         |
| IFX TC                         |                         |                        | <.001   |
| <5 $\mu\text{g/mL}$            | 40 (31)                 | 54/91 (59)             |         |
| 5–10 $\mu\text{g/mL}$          | 31 (24)                 | 19/91 (21)             |         |
| >5 $\mu\text{g/mL}$            | 59 (45)                 | 18/91 (20)             |         |
| Change in IFX treatment        | 52 (40)                 | 91 (68)                | <.001   |
| Change in IFX treatment type   |                         |                        | <.001   |
| IFX discontinuation            | 1 (1) <sup>a</sup>      | 38 (29)                |         |
| IFX therapy escalation         | 34 (26)                 | 50 (37)                |         |
| Shorten interval               | 11                      | 21                     |         |
| Dose increase                  | 17                      | 20                     |         |
| Combination <sup>b</sup>       | 6                       | 9                      |         |
| IFX therapy de-escalation      | 17 (13)                 | 3 (2) <sup>c</sup>     |         |
| Prolong interval               | 8                       | 3                      |         |
| Dose decrease                  | 7                       | 0                      |         |
| Combination <sup>d</sup>       | 2                       | 0                      |         |

NOTE. Values are n (%), n/n (%), or median (interquartile range).

ATI, antibodies to infliximab; IFX, infliximab; TC, trough concentration; TDM, therapeutic drug monitoring.

<sup>a</sup>Due to high ATI titer (35.6 U/mL).

<sup>b</sup>Shorten interval, dose increase, or addition of an IMM.

<sup>c</sup>Following clinical evaluation patients' symptoms were attributed to other reasons than increased IBD activity, such as gastrointestinal infection or irritable bowel syndrome.

<sup>d</sup>Prolong interval, dose decrease, or stopping an IMM.
